# Supplementary material for: Efficacy of Non-Invasive Brain Stimulation for Refractory Obsessive-Compulsive Disorder: A Meta-Analysis of Randomized Controlled Trials
Source: MDPI journal article supplement (doi:10.3390/brainsci12070943), 2022-07-19
Supplement: s1 [file s1]

## Supplementary Materials

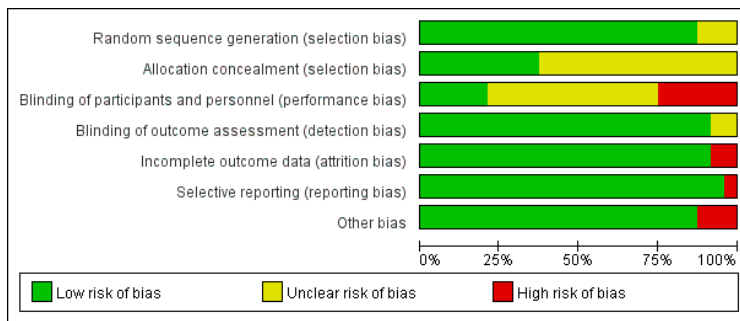

Figure S1. Risk of bias graph.

|                               | Random sequence generation (selection bias) | Allocation concealment (selection bias) | Blinding of participants and personnel (performance bias) | Blinding of outcome assessment (detection bias) | Incomplete outcome data (attrition bias) | Selective reporting (reporting bias) | Other bias |
|-------------------------------|---------------------------------------------|-----------------------------------------|-----------------------------------------------------------|-------------------------------------------------|------------------------------------------|--------------------------------------|------------|
| Arumugham et al., 2018        | +                                           | +                                       | ?                                                         | +                                               | +                                        | +                                    | +          |
| Bation et al., 2019           | +                                           | ?                                       | +                                                         | +                                               | +                                        | +                                    | +          |
| Carmi et al., 2018            | +                                           | +                                       | +                                                         | +                                               | +                                        | +                                    | +          |
| Carmi et al., 2019            | +                                           | +                                       | +                                                         | +                                               | +                                        | +                                    | +          |
| Dutta et al., 2021            | +                                           | +                                       | +                                                         | +                                               | +                                        | +                                    | +          |
| Gomes et al., 2012            | +                                           | ?                                       | ?                                                         | +                                               | +                                        | +                                    | +          |
| Gowda et al., 2019            | +                                           | +                                       | +                                                         | +                                               | +                                        | +                                    | +          |
| Haghighi et al., 2015         | +                                           | +                                       | ?                                                         | ?                                               | +                                        | +                                    | +          |
| Harika-Germaneau et al., 2019 | +                                           | ?                                       | ?                                                         | +                                               | +                                        | +                                    | +          |
| Hawken et al., 2016           | +                                           | ?                                       | ?                                                         | +                                               | +                                        | +                                    | +          |
| Jahangard et al., 2016        | +                                           | +                                       | ?                                                         | +                                               | +                                        | +                                    | +          |
| Kang et al., 2009             | +                                           | ?                                       | +                                                         | +                                               | +                                        | +                                    | +          |
| Liu et al., 2021              | +                                           | +                                       | ?                                                         | +                                               | +                                        | +                                    | +          |
| Mansur et al., 2011           | +                                           | ?                                       | +                                                         | +                                               | +                                        | +                                    | +          |
| Mantovani et al., 2010        | ?                                           | ?                                       | +                                                         | +                                               | +                                        | +                                    | +          |
| Nauczyciel et al., 2014       | ?                                           | ?                                       | ?                                                         | +                                               | +                                        | +                                    | +          |
| Pelissolo et al., 2016        | +                                           | ?                                       | +                                                         | +                                               | +                                        | +                                    | +          |
| Prasko et al., 2006           | +                                           | ?                                       | ?                                                         | +                                               | +                                        | +                                    | +          |
| Ruffini et al., 2009          | +                                           | ?                                       | ?                                                         | ?                                               | +                                        | +                                    | +          |
| Sachdev et al., 2007          | +                                           | ?                                       | ?                                                         | +                                               | +                                        | +                                    | +          |
| Seo et al., 2016              | +                                           | ?                                       | +                                                         | +                                               | +                                        | +                                    | +          |
| Shayganfard et al., 2016      | +                                           | +                                       | ?                                                         | +                                               | +                                        | +                                    | +          |
| Silva et al., 2021            | +                                           | ?                                       | +                                                         | +                                               | +                                        | +                                    | +          |
| Ziblak et al., 2021           | ?                                           | ?                                       | ?                                                         | +                                               | +                                        | +                                    | +          |

Figure S2. Risk of bias summary.
